# Supplementary material
Source: publisher figshare collection journal article supplement (https://frontiersin.figshare.com/ndownloader/files/25429127)
Supplement: Supplementary file [file 25429127]

**Table S1.** Implicated causes of rhabdomyolysis ( $n = 101$ )

| Category <sup>a</sup>                                 | Number | Percent of cohort |
|-------------------------------------------------------|--------|-------------------|
| Trauma                                                | 22     | 21.8              |
| Operative                                             | 13     | 12.9              |
| Acute ischemia or muscle bleeding                     | 14     | 13.9              |
| Pressure injury                                       | 38     | 37.6              |
| Exertional                                            | 0      | 0                 |
| Seizure                                               | 5      | 4.6               |
| Infection-related                                     | 33     | 32.7              |
| Drugs and toxins                                      | 30     | 29.7              |
| Inflammatory myopathies and myositis <sup>b</sup>     | 2      | 2.0               |
| Severe electrolyte or metabolic disorder <sup>c</sup> | 7      | 6.9               |
| Familial or inherited diseases <sup>d</sup>           | 1      | 1.0               |
| Thermal extremes and dysregulation <sup>e</sup>       | 3      | 3.0               |
| Uncertain cause                                       | 2      | 2.0               |

<sup>a</sup> Categories are not mutually exclusive due to multiple mechanisms in some patients.

<sup>b</sup> Polymyositis, dermatomyositis, inclusion body myositis and autoimmune disease with myositis.

<sup>c</sup> Serum sodium <120 mmol/L, potassium <2 mmol/L, phosphate <0.4 mmol/L and diabetic ketoacidosis.

<sup>d</sup> Metabolic myopathies, inborn errors of metabolism, mitochondrial disease.

<sup>e</sup> Heat stroke, malignant hyperthermia, severe hypothermia and near drowning.
